# Supplementary material
Source: PubMed Central journal article supplement (PMC10111124)
Supplement: EIJ-D-22-01022_Cannata_SD.pdf [file EIJ-D-22-01022_Cannata_SD.pdf]

## Supplementary data

### Supplementary Appendix 1. List of participating centres.

- CCS-ISMETT (Mediterranean Institute for Transplantation and Advanced Specialized Therapies), UPMC, Palermo- Italy
- Cardio-Thoracic-Vascular Department, IRCCS University Hospital of Bologna, Policlinico S. Orsola, Bologna, Italy;
- Division of Cardiology, Department of Medicine, University of Verona, Verona, Italy
- Erasmus University Medical Center, Thoraxcenter, Rotterdam, the Netherlands
- Fondazione C.N.R. Reg. Toscana G. Monasterio, Massa, Italy
- A.O.U. Policlinico “G. Rodolico-San Marco”, Catania, Italy
- Hospital de Santa Cruz, CHLO, Nova Medical School, CEDOC, Lisbon, Portugal
- Centro Cardiologico Monzino, I.R.C.C.S., University of Milan, Via Carlo Parea, 4, Milan, Italy
- Cardiovascular Institute, Hospital Clínico San Carlos, Madrid, Spain
- Mauriziano Hospital, Turin, Italy
- Ospedali Riuniti di Ancona, Ancona, Italy:
- Interventional Cardiology Unit, Department of Cardiac, Thoracic, Vascular Sciences and Public Health, University of Padua, Padua, Italy

**Supplementary Table 1. Echocardiographic outcomes of unadjusted and propensity-matched populations at 1 year.**

|                            | Unadjusted |                   |                    |            | Propensity matched |            |
|----------------------------|------------|-------------------|--------------------|------------|--------------------|------------|
|                            | Sapien 3   | Sapien 3<br>Ultra | OR (95% CI)        | p<br>value | OR (95% CI)        | p<br>value |
| Peak gradient<br>(mmHg)    | 20.9±8.74  | 20.73±8.06        | 0.93 (0.61-1.41)   | 0.807      | -0.73 (-3.17-1.85) | 0.558      |
| Mean gradient<br>(mmHg)    | 11.55±9.37 | 11.26±4.47        | 0.52 (0.26-1.04)   | 0.666      | -0.64 (-2.19-0.90) | 0.389      |
| AVA (cm <sup>2</sup> )     | 1.49±0.39  | 1.53±0.38         | 0.45 (0.17-1.18)   | 0.472      | 0.07 (-0.09-0.10)  | 0.08       |
| None-trace PVL             | 496 (67.6) | 173 (80.0)        | 1.88 (1.31-2.74)   | <0.01      | 1.71 (1.28-2.28)   | <0.01      |
| Mild PVL                   | 216 (29.5) | 37 (17.2)         | 0.50 (0.34 -0.73)  | <0.01      | 0.63 (0.44-0.88)   | <0.01      |
| Moderate or<br>greater PVL | 21 (2.9)   | 6 (2.8)           | 0.98 (0.36-2.33)   | 0.975      | 0.88 (0.42-0.1.85) | 0.738      |
| LVEF (%)                   | 58.68±9.04 | 57.62±8.55        | -1.05 (-2.43-0.32) | 0.133      | -0.48 (-2.06-1.09) | 0.533      |

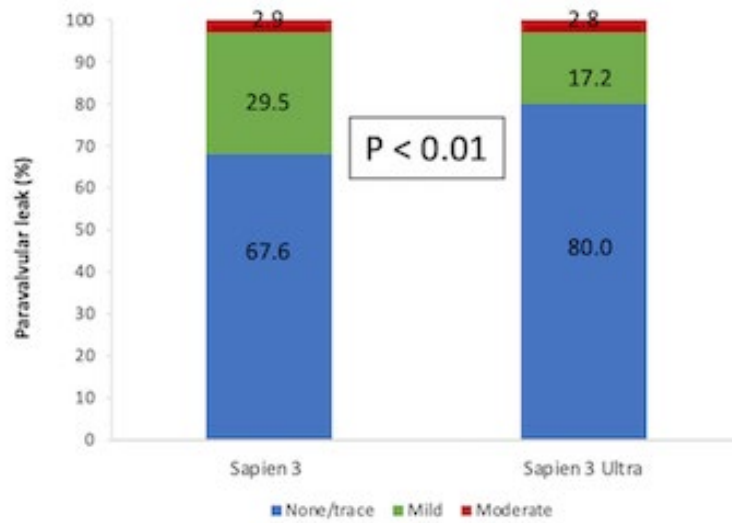

**Supplementary Figure 1.** Rate of paravalvular leak (PVL) at 1 year.

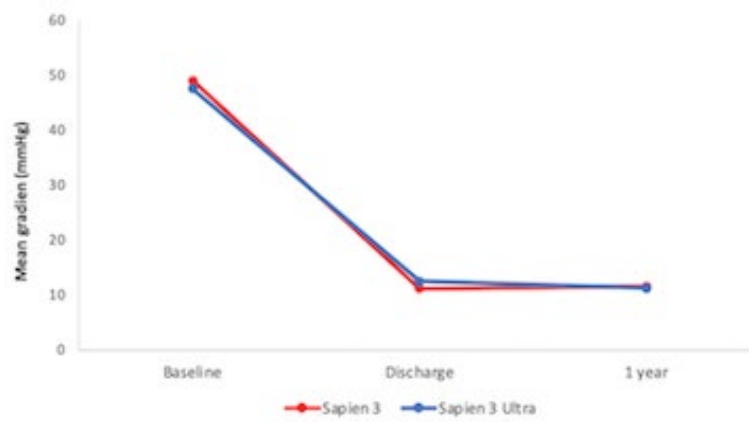

**Supplementary Figure 2.** Mean gradient before and after TAVI.
